# Supplementary material for: Periodontal Tissue Regeneration by Recombinant Human Collagen Peptide Granules Applied With β-Tricalcium Phosphate Fine Particles
Source: Preprints.org preprint supplement (doi:10.20944/preprints202210.0311.v1), 2022-10-20
Supplement: Supplementary file 1 [file supplementary]

**Periodontal tissue regeneration by recombinant human collagen peptide granules applied with β-tricalcium phosphate fine particles**

Yuto Yoshino1, Hirofumi Miyaji1*, Erika Nishida1, Yukimi Kanemoto1, Asako Hamamoto1, Akihito Kato1, Tsutomu Sugaya1, Tsukasa Akasaka2

1 Department of Periodontology and Endodontology, Faculty of DentalMedicine, Hokkaido University, Sapporo,Hokkaido, Japan

2 Department of Biomedical Materials and Engineering, Faculty of Dental Medicine, Hokkaido University, Sapporo, Hokkaido, Japan

**Corresponding author**

Hirofumi MIYAJI

Department of Periodontology and Endodontology, Faculty of Dental Medicine, Hokkaido University, N13, W7, Kita-ku, Sapporo, Hokkaido 060-8586, Japan.

E-mail: [miyaji@den.hokudai.ac.jp](mailto:miyaji@den.hokudai.ac.jp)

**Supplementary Figure 1. HE stained sections**

The black dashed lines indicate the border of the bone defects.

Abbreviations: Ctrl, control; FT, fibrous tissue; NB, new bone-like tissue; PB, pre-existing bone; R, root; RCP, recombinant human collagen peptide; TCP, tricalcium phosphate.
